# Supplementary material for: Flying squirrels use a mortise-tenon structure to fix nuts on understory twigs
Source: eLife. 2023 Jun 13;12:e84967. doi: 10.7554/eLife.84967 (PMC10328505; doi:10.7554/eLife.84967)
Supplement: Supplementary file 1. [file elife-84967-supp1.xlsx]

## Sheet: Sheet1
Family	Species name	Growth form
Ancistrocladaceae	Ancistrocladus tectorius (Lour.) Merr.	Liana
Annonaceae	Dasymaschalon rostratum Merrill & Chun	Tree
Aquifoliaceae	Ilex goshiensis Hayata	Tree
Araliaceae	Schefflera heptaphylla (Linnaeus) Frodin	Tree
Arecaceae (Palmae)	Pinanga baviensis Beccari	Tree
Arecaceae (Palmae)	Calamus rhabdocladus Burret	Liana
Clusiaceae (Guttiferae)	Calophyllum membranaceum Gardner & Champion	Tree
Clusiaceae (Guttiferae)	Garcinia oblongifolia Champion ex Bentham	Tree
Eriaceae	Rhododendron moulmainense Hook. f.	Tree
Euphorbiaceae	Glochidion coccineum (Buchanan-Hamilton) Müller Argoviensis	Tree
Euphorbiaceae	Antidesma montanum Blume	Tree
Fagaceae	Lithocarpus fenzelianus A. Camus	Tree
Fagaceae	Castanopsis fissa (Champion ex Bentham) Rehder & E. H. Wilson	Tree
Fagaceae	Lithocarpus handelianus A. Camus	Tree
Fagaceae	Lithocarpus amygdalifolius (Skan) Hayata	Tree
Juglandaceae	Engelhardia roxburghiana Wallich	Tree
Lauraceae	Beilschmiedia tungfangensis S. K. Lee & L. F. Lau	Tree
Lauraceae	Cryptocarya chinensis (Hance) Hemsley	Tree
Lauraceae	Machilus chinensis (Bentham) Hemsley	Tree
Lauraceae	Cinnamomum rigidissimum Hung T. Chang	Tree
Lauraceae	Neolitsea ellipsoidea C. K. Allen	Tree
Lauraceae	Litsea variabilis f. chinensis (C. K. Allen) Yen C. Yang & P. H. Huang	Tree
Lauraceae	Cinnamomum burmannii (Nees & T. Nees) Blume	Tree
Magnoliaceae	Lirianthe championii (Bentham) N. H. Xia & C. Y. Wu,	Tree
Magnoliaceae	Lirianthe championii (Bentham) N. H. Xia & C. Y. Wu,	Tree
Melastomataceae	Blastus cochinchinensis Loureiro	Tree
Melastomataceae	Memecylon ligustrifolium Champion ex Bentham	Tree
Myrsinaceae	Ardisia quinquegona Blume	Tree
Myrtaceae	Syzygium hancei Merrill & L. M. Perry	Tree
Myrtaceae	Syzygium championii (Bentham) Merrill & L. M. Perry	Tree
Oleaceae	Olea tsoongii (Merrill) P. S. Green	Tree
Pittosporaceae	Pittosporum perryanum Gowda	Tree
Polygalaceae	Xanthophyllum hainanense Hu	Tree
Proteaceae	Heliciopsis lobata (Merrill) Sleumer	Tree
Rosaceae	Eriobotrya deflexa (Hemsley) Nakai	Tree
Rubiaceae	Lasianthus curtisii King & Gamble	Tree
Rubiaceae	Pertusadina metcalfii (Merrill ex H. L. Li) Y. F. Deng & C. M. Hu	Tree
Rubiaceae	Psydrax dicocca Gaertner	Tree
Rubiaceae	Psychotria asiatica Linnaeus	Tree
Rubiaceae	Tarennoidea wallichii (J. D. Hooker) Tirvengadum & Sastre	Tree
Rubiaceae	Ixora nienkui Merrill & Chun	Tree
Rubiaceae	Wendlandia uvariifolia Hance	Tree
Rubiaceae	Prismatomeris tetrandra (Roxburgh) K. Schumann	Tree
Rutaceae	Melicope chunii (Merrill) T. G. Hartley	Tree
Sabiaceae	Meliosma angustifolia Merrill	Tree
Sapindaceae	Nephelium topengii (Merrill) H. S. Lo	Tree
Sapotaceae	Sarcosperma laurinum (Bentham) J. D. Hooker	Tree
Symplocaceae	Symplocos anomala Brand	Tree
Symplocaceae	Symplocos lancifolia Siebold & Zuccarini	Tree
Symplocaceae	Symplocos hainanensis Merrill & Chun ex H. L. Li	Tree
Symplocaceae	Symplocos viridissima Brand	Tree
Theaceae	Pyrenaria jonquieriana Pierre ex Lanessan subsp. multisepala (Merrill & Chun) S. X. Yang	Tree
Theaceae	Ternstroemia gymnanthera (Wight & Arnott) Beddome	Tree
Theaceae	Schima superba Gardner & Champion	Tree
Ulmaceae	Gironniera subaequalis Planchon	Tree
Dead standing tree		Tree
Other unidentified liana		Liana
Other unidentified bamboo		Bamboo
